# Supplementary material for: Combination With Low-dose Dextromethorphan Improves the Effect of Amlodipine Monotherapy in Clinical Hypertension: A First-in-human, Concept-proven, Prospective, Dose-escalation, Multicenter Study
Source: PubMed Central journal article supplement — Medicine (Baltimore). 2016 Mar 25;95(12):e3234. doi: 10.1097/MD.0000000000003234 (PMC4998419; doi:10.1097/md.0000000000003234), 2016-03-25
Supplement: medi-95-e3234-s001.pdf [file medi-95-e3234-s001.pdf]

## Supplementary Table 1

**Table S1.1. Mean reduction from baseline in SBP at each visit- PP population**

| SBP (mmHg)     | DXM 0 mg<br>N=31 | DXM 2.5 mg<br>N=16  | DXM 7.5 mg<br>N=6   | DXM 30 mg<br>N=25  | P-value# |
|----------------|------------------|---------------------|---------------------|--------------------|----------|
| <b>Week 6</b>  |                  |                     |                     |                    |          |
| Mean ± SD      | 1.8 ± 7.8        | <b>-14.0 ± 8.1</b>  | 1.3 ± 11.7          | 0.0 ± 8.2          | <0.001*  |
| p-value\$      | 0.21             | <0.001*             | 0.81                | >0.99              |          |
| <b>Week 10</b> |                  |                     |                     |                    |          |
| Mean ± SD      | 1.5 ± 8.1        | -9.4 ± 12.1         | <b>-10.8 ± 10.2</b> | -0.6 ± 7.4         | <0.001*  |
| p-value\$      | 0.30             | 0.007*              | 0.049*              | 0.67               |          |
| <b>Week 14</b> |                  |                     |                     |                    |          |
| Mean ± SD      | 0.5 ± 7.8        | <b>-11.9 ± 10.8</b> | <b>-7.7 ± 3.4</b>   | -0.7 ± 10.5        | 0.001*   |
| p-value\$      | 0.67             | <b>0.003*</b>       | <b>0.003*</b>       | 0.75<br>(0.011*)\$ |          |

SD: standard deviation; CI: confidence interval; DXM: dextromethorphan

P-value# by one-way ANOVA; p-value\$ by paired t test; \*statistical significance

\$ For those 4 patients who achieved the BP goal at the end of study, there was a significant reduction of 15.3 ± 5.5 mmHg in SBP from baseline at week 14.

**Table S1.2. Mean reduction from baseline in DBP at each visit - PP population**

| DBP (mmHg)     | DXM 0 mg<br>N=31 | DXM 2.5 mg<br>N=16 | DXM 7.5 mg<br>N=6 | DXM 30 mg<br>N=25 | P-value# |
|----------------|------------------|--------------------|-------------------|-------------------|----------|
| <b>Week 6</b>  |                  |                    |                   |                   |          |
| Mean ± SD      | -0.2 ± 6.4       | <b>-7.2 ± 4.1</b>  | -1.7 ± 3.6        | -0.9 ± 3.9        | <0.001*  |
| p-value\$      | 0.87             | <0.001*            | 0.31              | 0.27              |          |
| <b>Week 10</b> |                  |                    |                   |                   |          |
| Mean ± SD      | 0.0 ± 4.7        | -5.2 ± 5.9         | <b>-4.9 ± 2.9</b> | -2.5 ± 4.6        | 0.004*   |
| p-value\$      | 0.99             | 0.003*             | 0.009*            | 0.01*             |          |
| <b>Week 14</b> |                  |                    |                   |                   |          |
| Mean ± SD      | -1.9 ± 6.2       | <b>-6.4 ± 6.7</b>  | <b>-4.6 ± 2.1</b> | -1.6 ± 5.2        | 0.045*   |
| p-value\$      | 0.10             | <b>0.002*</b>      | <b>0.003*</b>     | 0.13<br>(0.15)\$  |          |

SD: standard deviation; CI: confidence interval; DXM: dextromethorphan

P-value# by one-way ANOVA; p-value\$ by paired t test; \*statistical significance

\$ For those 4 patients who achieved the BP goal at the end of study, there was no significant reduction in DBP from baseline at week 14.

**Table S1.3. Percentage change from baseline in SBP at each visit - PP population**

| SBP (%)        | DXM 0 mg<br>N=31 | DXM 2.5 mg<br>N=16 | DXM 7.5 mg<br>N=6 | DXM 30 mg<br>N=25 | P-value#   |
|----------------|------------------|--------------------|-------------------|-------------------|------------|
| <b>Week 6</b>  |                  |                    |                   |                   |            |
| Mean ± SD      | 1.5 ± 6.2        | <b>-9.3 ± 5.1</b>  | 0.9 ± 8.3         | 0.1 ± 5.5         | <0.001*    |
| p-value\$      | 0.19             | <0.001*            | 0.81              | 0.94              |            |
| <b>Week 10</b> |                  |                    |                   |                   |            |
| Mean ± SD      | 1.3 ± 6.5        | -6.1 ± 8.0         | <b>-7.5 ± 7.0</b> | -0.3 ± 4.9        | 0.003*     |
| p-value\$      | 0.29             | 0.008*             | 0.047*            | 0.75              |            |
| <b>Week 14</b> |                  |                    |                   |                   |            |
| Mean ± SD      | 0.5 ± 6.3        | <b>-7.9 ± 7.0</b>  | <b>-5.4 ± 2.4</b> | -0.5 ± 6.9        | <0.001*    |
| p-value\$      | 0.64             | <0.001*            | 0.003*            | 0.74              | (0.009*)\$ |

SD: standard deviation; CI: confidence interval; DXM: dextromethorphan

P-value# by one-way ANOVA; p-value\$ by paired t test; \*statistical significance

\$ For those 4 patients who achieved the BP goal at the end of study, there was a significant reduction of  $10.2 \pm 53.4$  % in SBP from baseline at week 14.
